# Supplementary material for: Comparison of transgenic and adenovirus hACE2 mouse models for SARS-CoV-2 infection
Source: PubMed Central journal article supplement (PMC7655046; doi:10.1080/22221751.2020.1838955), 2020-11-06

# Composite Pathology Score (Lung H&E)

Composite Pathology Score

36  
32  
28  
24  
20  
16  
12  
8  
4  
0

- B6+Ad-hACE2
- K18-hACE2

D0 D2 D5 D6

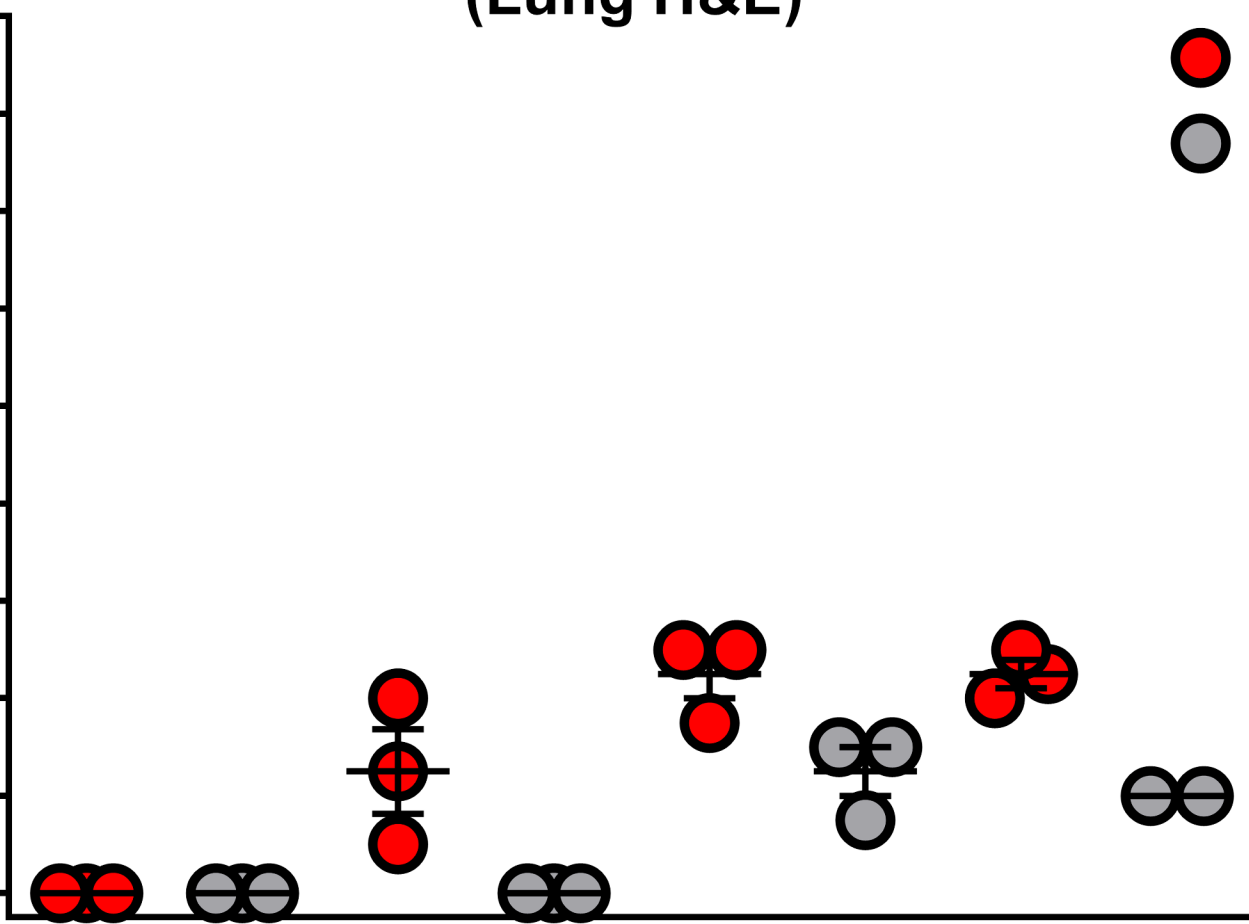

Supplement: TEMI_A_1838955_SM3780.pdf [file TEMI_A_1838955_SM3780.pdf]
