# Supplementary material for: Comparison of transgenic and adenovirus hACE2 mouse models for SARS-CoV-2 infection
Source: PubMed Central journal article supplement (PMC7655046; doi:10.1080/22221751.2020.1838955), 2020-11-06

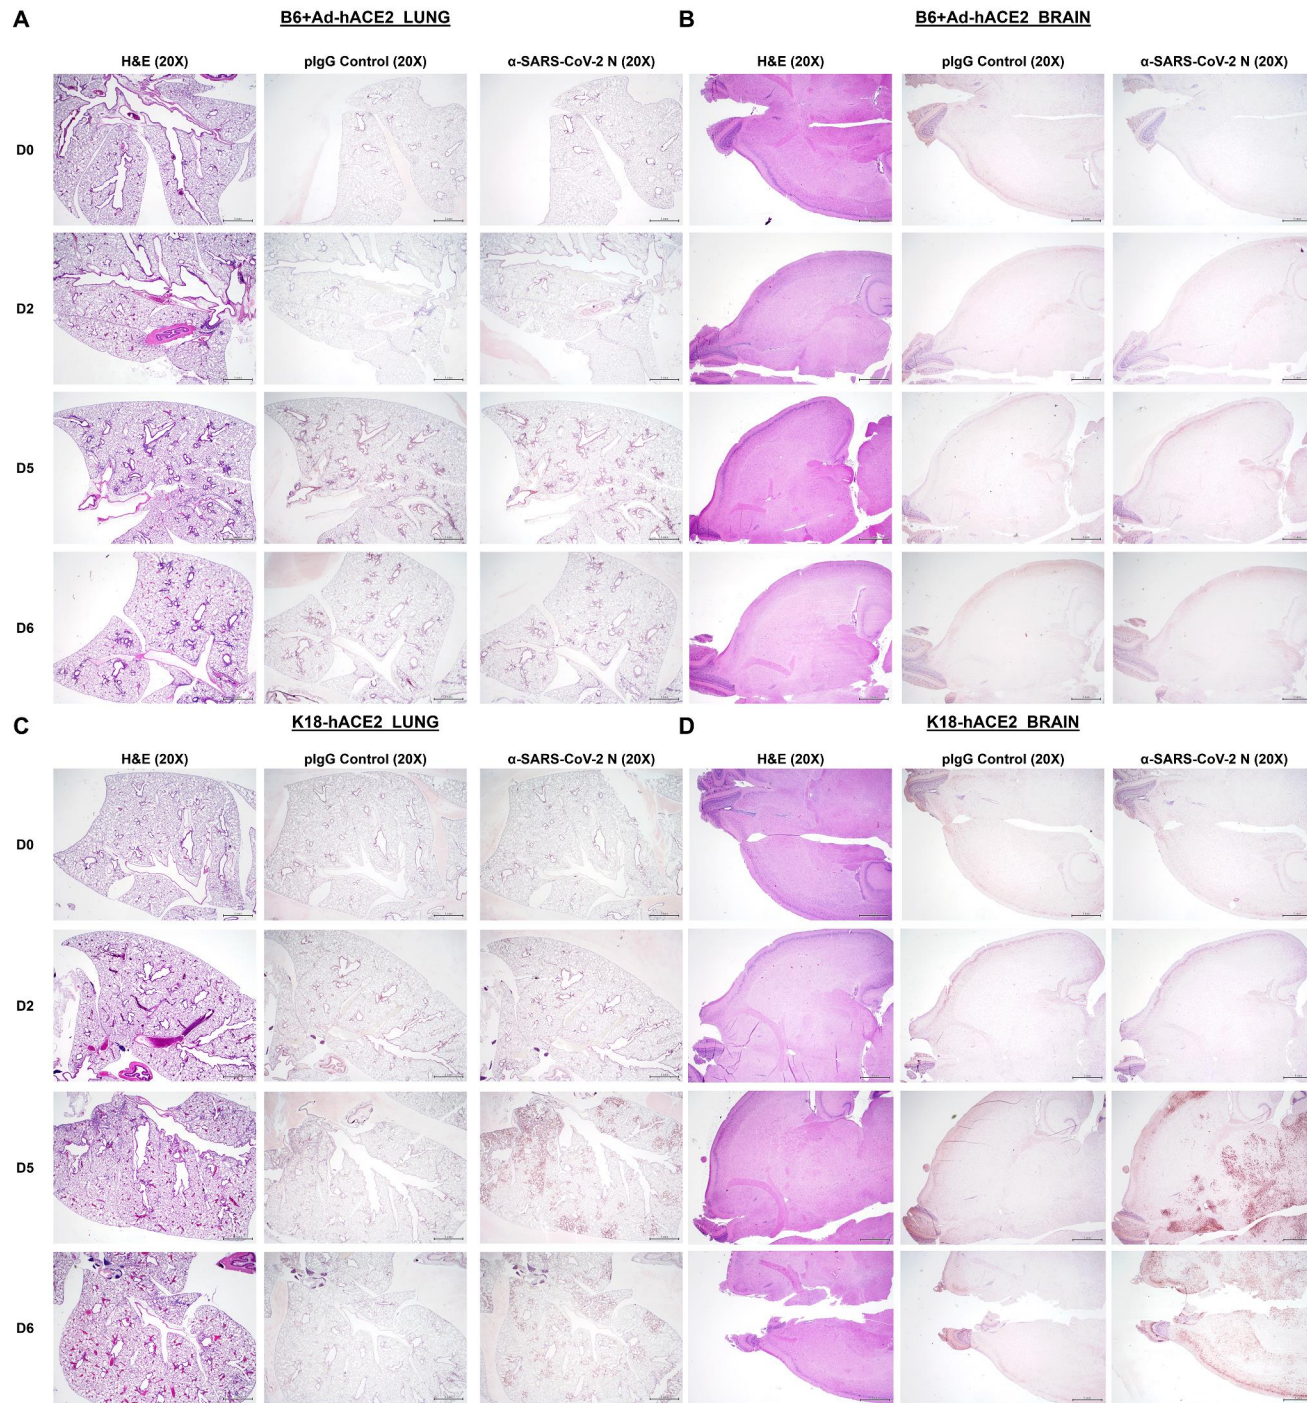

Supplement: TEMI_A_1838955_SM3933.pdf [file TEMI_A_1838955_SM3933.pdf]
